# Supplementary material for: Electrochemical sensor based on palladium loaded laser scribed graphitic carbon nanosheets for ultrasensitive detection of hydrazine
Source: Royal Society of Chemistry journal article supplement (doi:10.1039/c8nj02134a), 2018-01-01
Supplement: c8nj02134a1.pdf [file c8nj02134a1.pdf]

Supplementary Material

For

**Electrochemical sensor based on laser scribed graphitic  
carbon nanosheets loading palladium nanoparticles:  
Ultrasensitive detection of hydrazine**

**Yuxin Zhang <sup>a</sup>, Jianshan Ye <sup>a,\*</sup>**

*<sup>a</sup> College of Chemistry and Chemical Engineering, South China University of  
Technology, Guangzhou 510641, P.R. China*

Corresponding author at: College of Chemistry and Chemical Engineering, South  
China University of Technology, Guangzhou 510641, P.R. China.

Tel.: +86 20 87113241.

*E-mail:* jsye@scut.edu.cn (J. Ye)

**New Journal of Chemistry**

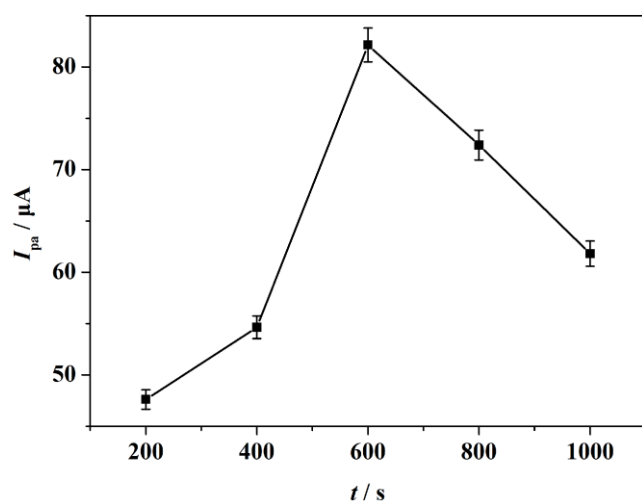

**Fig. S1** The oxidation peak current of 2.0 mM hydrazine in 0.1 M PBS (pH = 7) at Pd/LSGCNs/GCE with different electrodeposition time of Pd (200, 400, 600, 800 and 1000 s) at -0.2 V potential

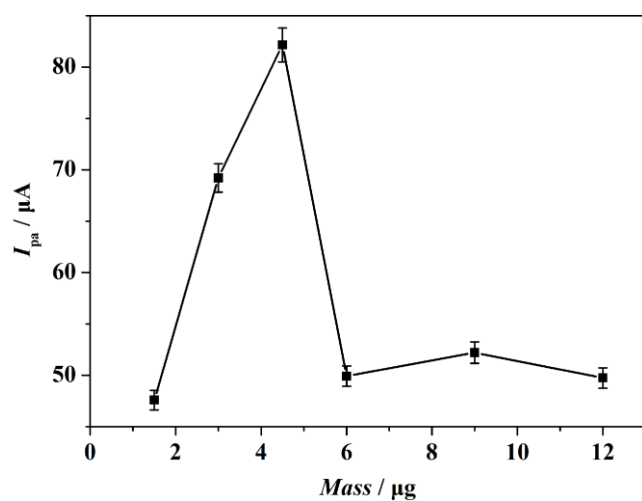

**Fig. S2** The oxidation peak current of hydrazine on the different mass of Pd/LSGCNs/GCE in the presence of 2.0 mM hydrazine in 0.1 M PBS (pH=7): 1.5, 3.0, 4.5, 6.0, 9.0 and 12.0  $\mu g$

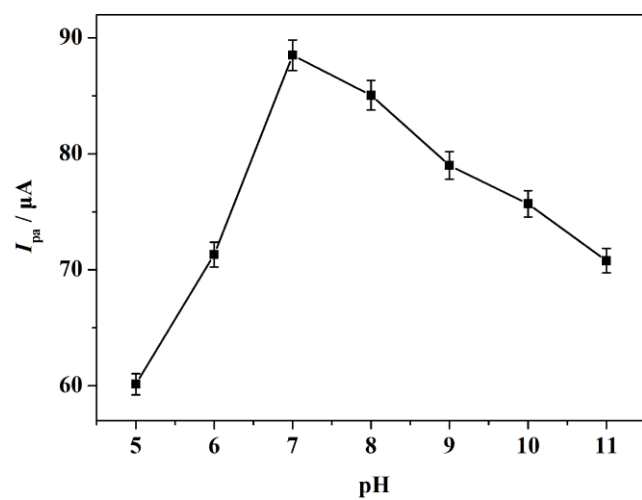

**Fig. S3** Variation of the anodic peak current with pH

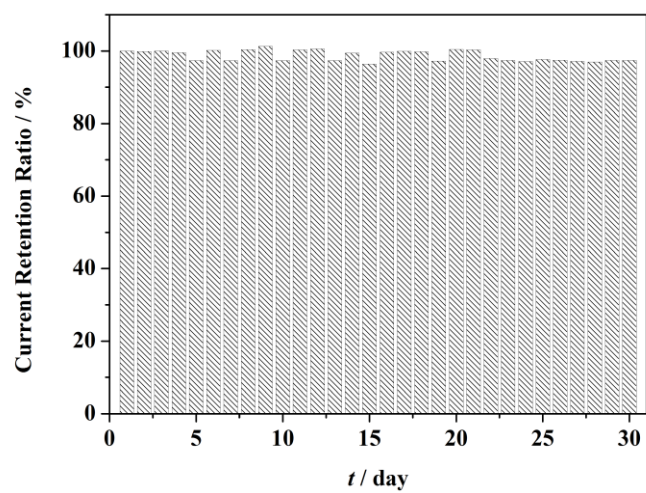

**Fig. S4** The current conservation ratio for Pd/LSGCNs/RDE during one month

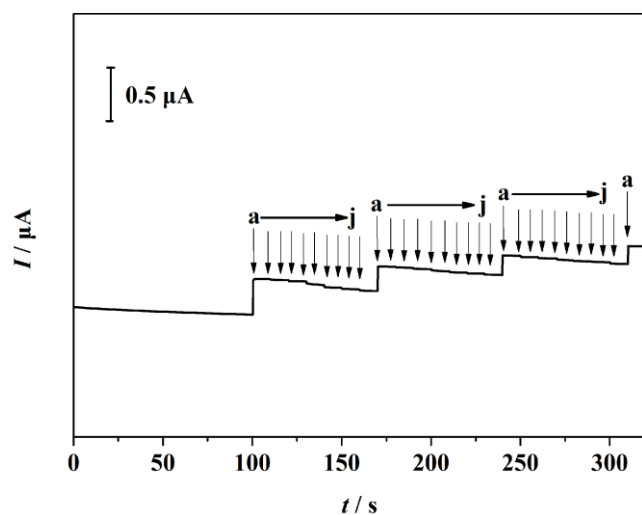

**Fig. S5** Amperometric response on Pd/LSGCNs/RDE of (a) 5  $\mu\text{M}$  hydrazine added into 0.1 M PBS (pH=7) with (b) uric acid in 3-fold concentration, (c)  $\text{Na}^+$ , (d)  $\text{CO}_3^{2-}$  and (e) fructose in 60-fold concentration, and (f) glucose, (g)  $\text{NH}_4^+$ , (h)  $\text{Cl}^-$ , (i)  $\text{K}^+$  and (j)  $\text{NO}_3^-$  in 200-fold concentration
